# Supplementary material
Source: PubMed Central journal article supplement (PMC3388792)
Supplement: embor201272s1.pdf [file embor201272s1.pdf]

## Supplementary information

Supplementary methods, Supplementary References, Supplementary Figures S1 to S4 and Supplementary Table S1 (strain list)

### Supplementary methods

Figure S1. FISH was performed on paraformaldehyde fixed cells as described [S1]. Cosmids were used as FISH probes. Chromosome 1 cosmids were obtained from the Sanger Sanger (U. K.) and used as in [S1]. Chromosome 2 cosmids used as probes were c1228 (*cen2* proximal) and c3F8 (left arm) [S2]. Distances between FISH signals were measured from maximum projections of images created from z series of eight 0.4- $\mu\text{m}$  steps using MetaMorph software.

Figure S2 and S3. Pds5-GFP was detected using anti-GFP polyclonal antibodies (A11122, 2 $\mu\text{g}/\mu\text{l}$ ) on nuclear spreads (D800) and by ChiP (2 $\mu\text{g}/\text{ChiP}$ ).

Figure S4. Cells were arrested in G1 by the overexpression of a C-terminal fragment of the Res1 protein as described [S3]. To estimate Rad21 half-life on chromatin, individual data sets were fitted to a single exponential function using GraphPadPrism 4 (GraphPad Software).

### Supplementary References

- S1. Bernard P, Maure JF, Partridge JF, Genier S, Javerzat JP, Allshire RC (2001) Requirement of heterochromatin for cohesion at centromeres. *Science* 294: 2539-2542.
- S2. Bernard P, Drogat J, Maure JF, Dheur S, Vaur S, Genier S, Javerzat JP (2006) A screen for cohesion mutants uncovers Ssl3, the fission yeast counterpart of the cohesin loading factor Scc4. *Curr Biol* 16: 875-881
- S3. Bernard P, Schmidt CK, Vaur S, Dheur S, Drogat J, Genier S, Ekwall K, Uhlmann F, Javerzat JP (2008) Cell-cycle regulation of cohesin stability along fission yeast chromosomes. *EMBO J* 27: 111-121

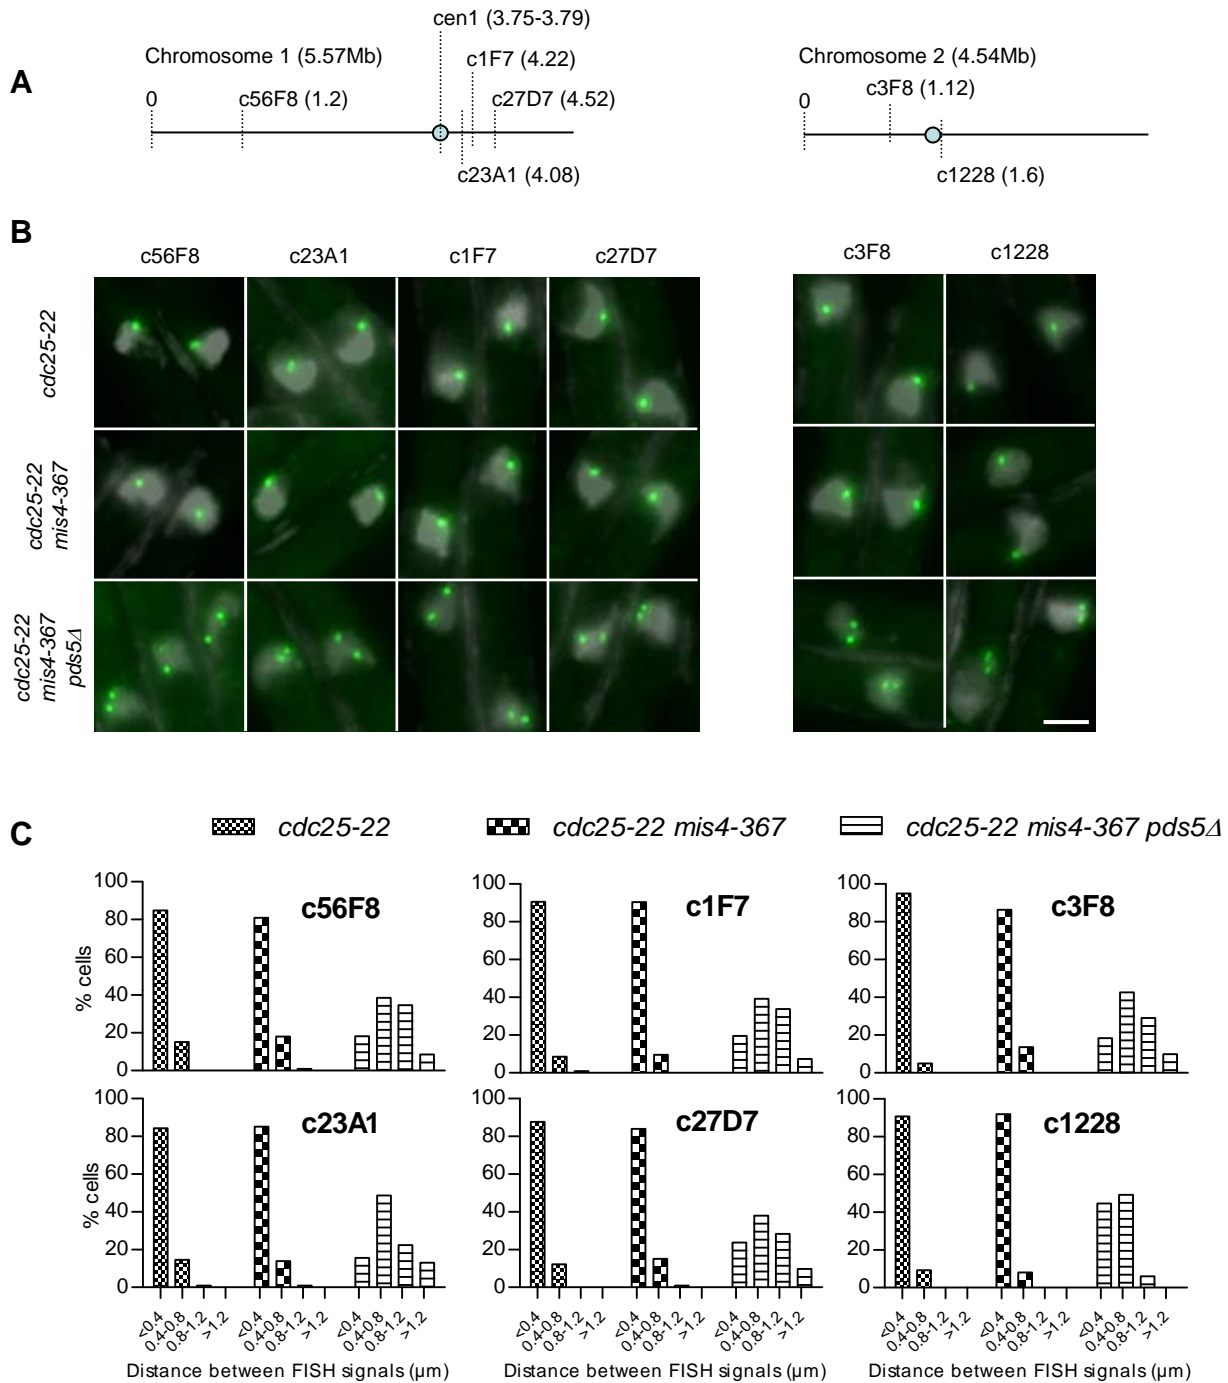

**Figure S1. Loss of sister-chromatid cohesion in *pds5Δ* arrested G2 cells.**

(A) Schematics showing the position of the FISH probes along chromosomes 1 and 2. Distances are in megabases. (B) FISH on G2 arrested cells. Cycling cells at 25°C (~80% G2) were shifted to 37°C for 3 hours and processed for FISH with the indicated cosmid probes. FISH signals appear in green, DAPI-stained nuclei in grey. Bar = 2μm. In an otherwise wt or *mis4-367* background the 2 FISH signals are co-localized or closely apposed to each other. By contrast the two FISH signals are separated in *pds5Δ* cells. (C) The distance between the 2 FISH signals was measured for 100-150 nuclei per sample. The distribution is similar in wt and *mis4-367* cells with most cells showing closely apposed (<0.4μm) signals. By contrast, most *pds5Δ* cells show widely separated (>0.4μm) FISH signals.

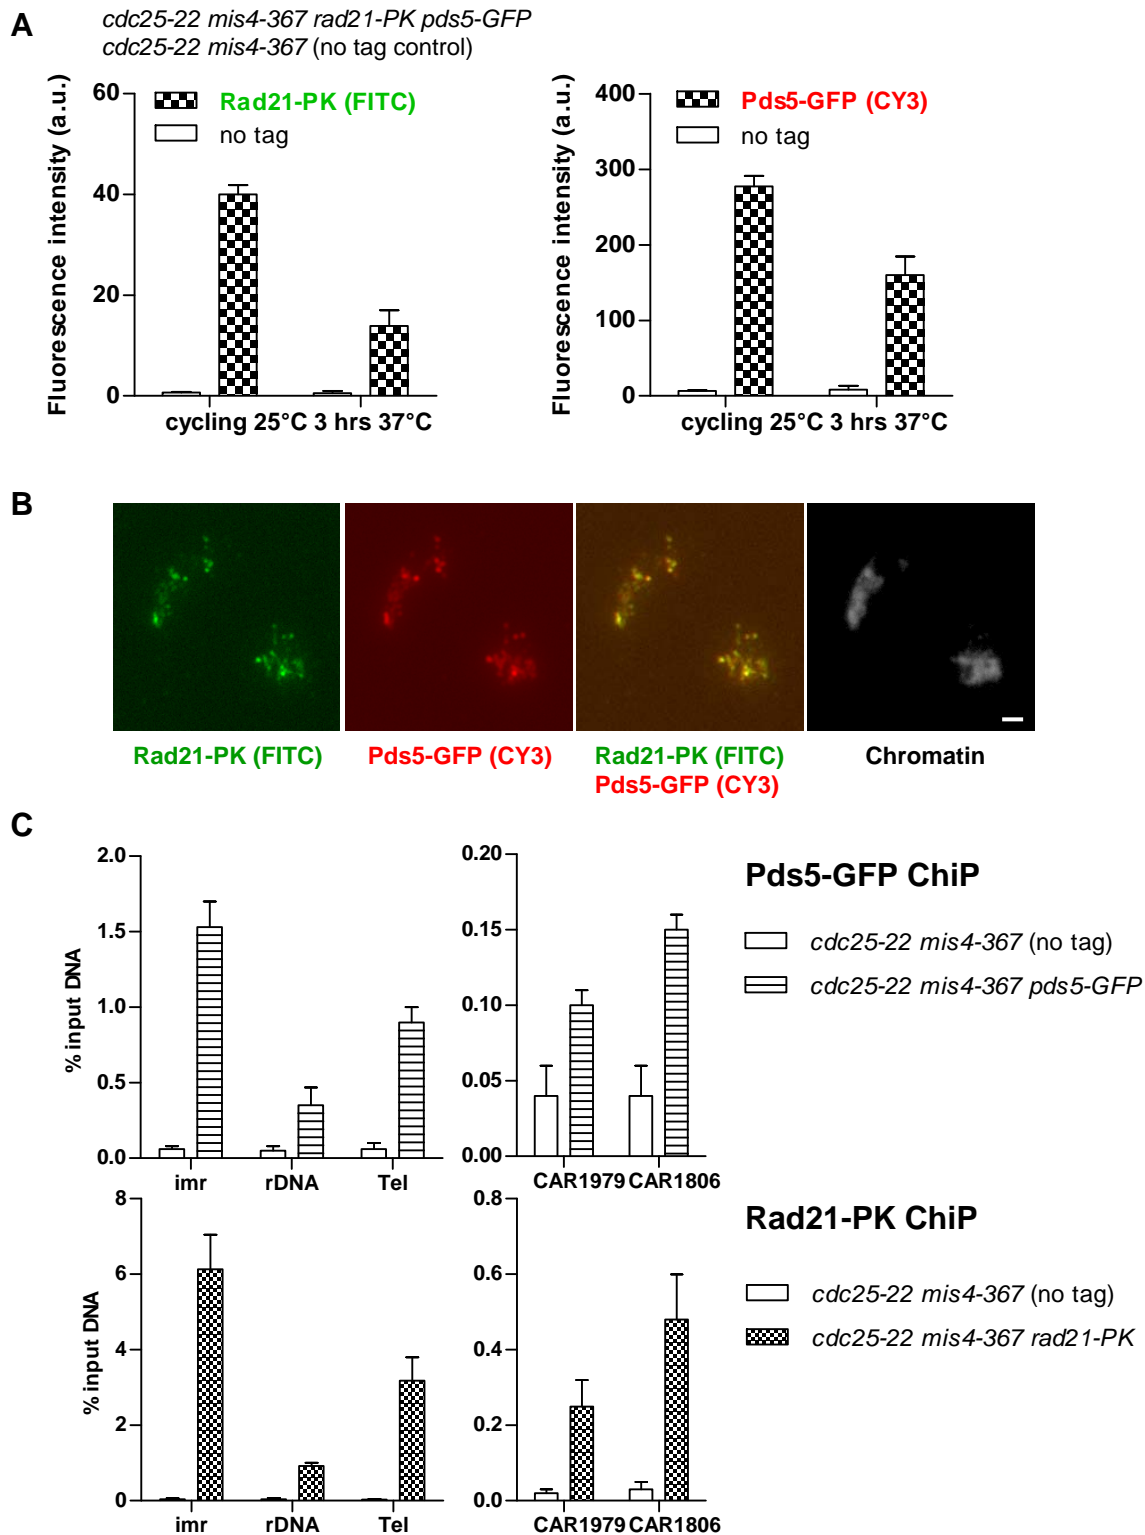

**Figure S2. Pds5 co-localizes with the stable fraction of Rad21 on replicated chromosomes.** (A) A fraction of Pds5 remains bound to G2 chromosomes after inactivation of the cohesin loader. Cycling *cdc25-22 mis4-367 rad21-PK pds5-GFP* cells were shifted to 37°C for 3 hours. Chromatin-bound Rad21-PK and Pds5-GFP were quantified from nuclear spreads before and after the temperature shift from 70-80 nuclei per sample. Error bar = 95% confidence interval of the mean with  $\alpha=0.05$ . (B) Images of nuclear spreads after the 3 hours shift at 37°C showing that Pds5-GFP and Rad21-PK dots are co-localized. Bar = 2 $\mu$ m. (C) ChIP assay after the 3 hours shift at 37°C showing that Pds5-GFP and Rad21-PK display similar binding patterns. Error bar = SD from 3 ChIPs.

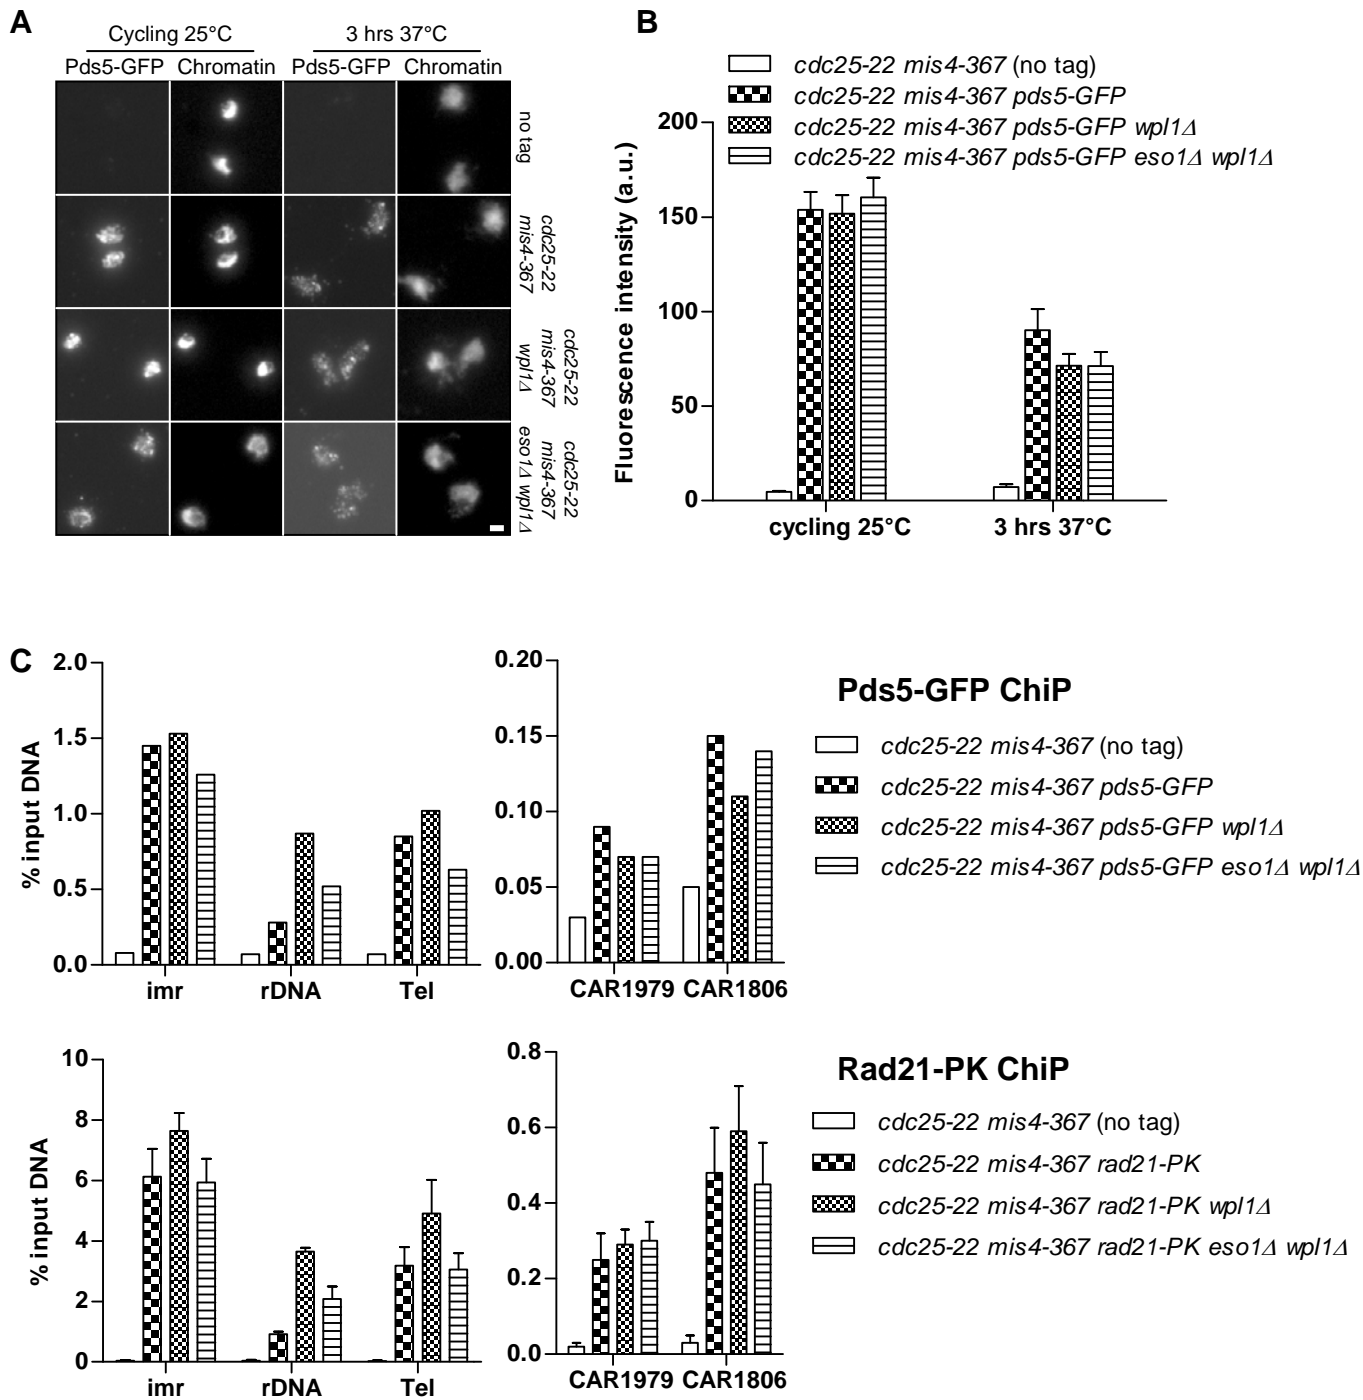

**Figure S3. Pds5 and Rad21 binding to chromosomes in *wpl1Δ* and *eso1Δ wpl1Δ*.**

Cycling cells at 25°C were shifted to 37°C for 3 hours to prevent further cohesin deposition (*mis4-367*) while *cdc25-22* prevented entry into mitosis. (A) Images of Pds5-GFP immunofluorescence on nuclear spreads from cells collected before and after 3 hours at 37°C. Chromatin was counterstained with DAPI. Bar = 2 μm. (B) Quantification of chromatin-bound Pds5. Pds5-GFP fluorescence intensity was measured for 50-100 nuclei for each sample. Error bar = 95% confidence interval of the mean with  $\alpha = 0.05$ . (C) ChIP assays showing that Pds5 and the stable fraction of Rad21 are found at the same chromosomal locations. Cells were collected 3 hours after the shift at 37°C and processed for Pds5-GFP ChIP (mean from 2 ChIPs) and Rad21-PK ChIP (error bar = SD from 4 ChIPs).

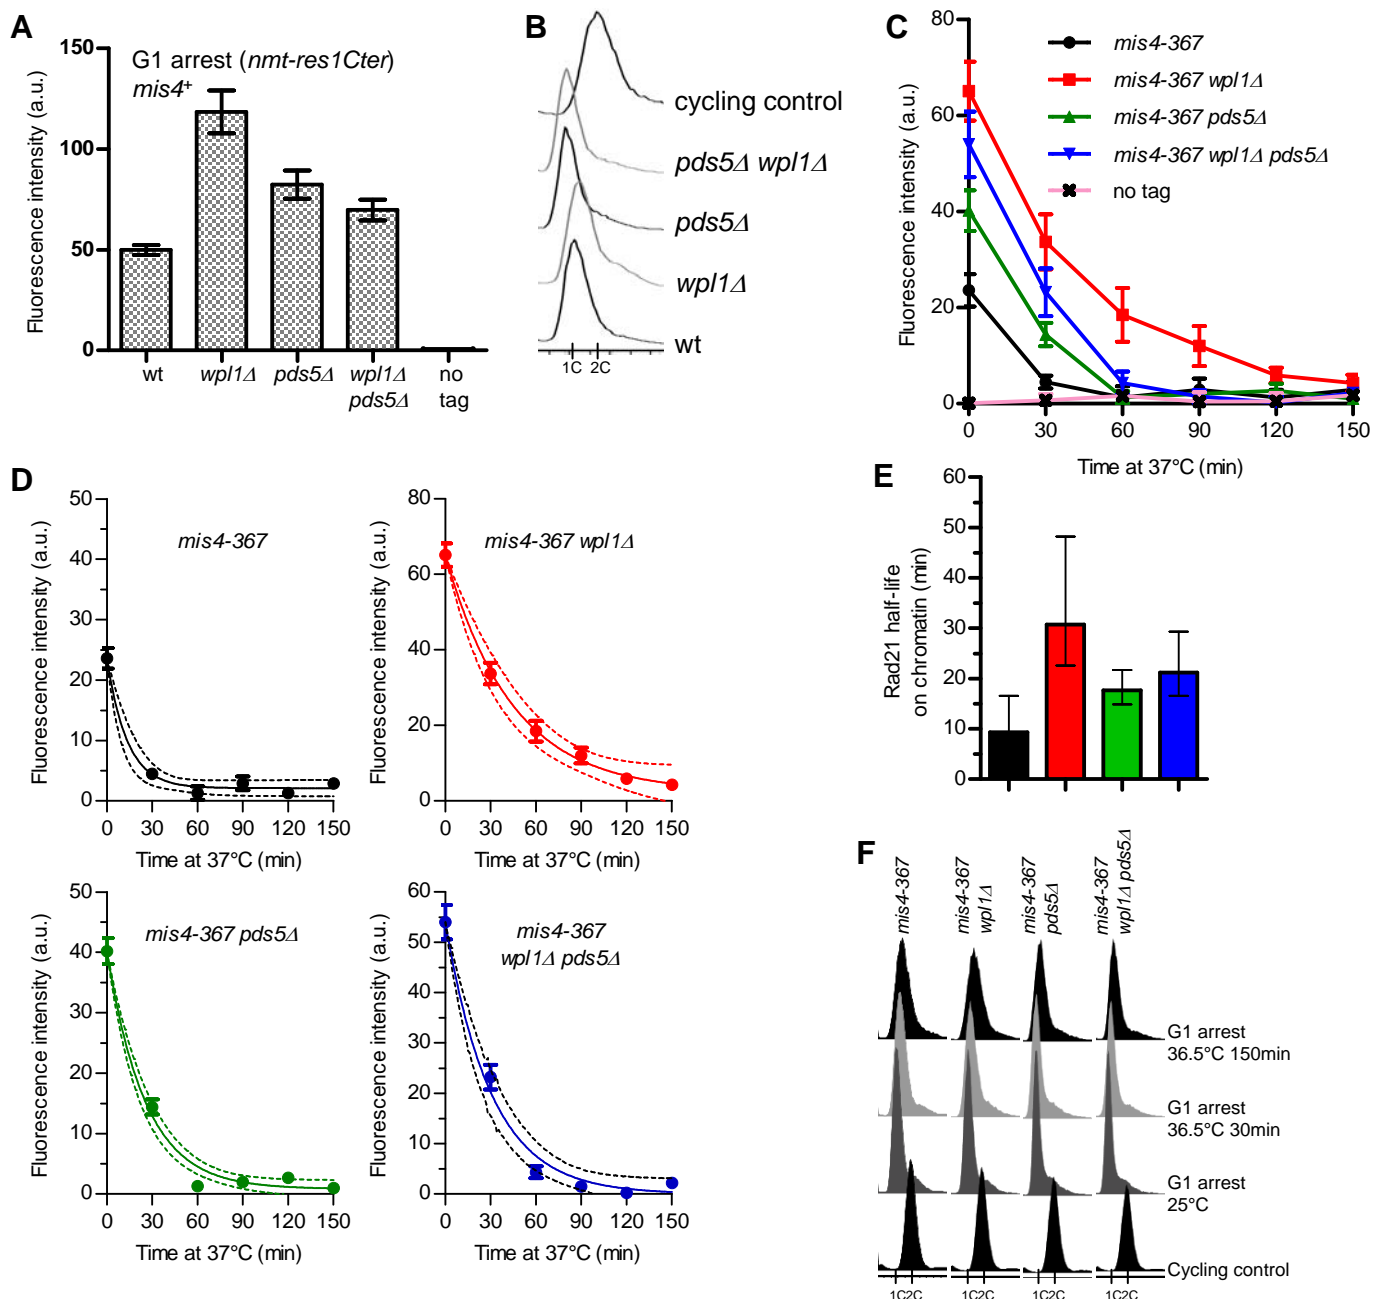

**Figure S4. Wpl1 and Pds5 promote Rad21 release from G1 chromatin**

(A) Steady state amount of chromatin-bound Rad21-PK in G1 arrested *mis4<sup>+</sup>* cells. Cells were arrested in G1 by the overexpression of the C-terminal domain of Res1 (*nmt-res1Cter* [S3]). Nuclear spreads were made and chromatin-bound Rad21-PK was detected by indirect immunofluorescence. Fluorescence intensity was measured for 50-100 nuclei per sample. Error bar = 95% confidence interval of the mean with  $\alpha = 0.05$ . (B) Flow cytometry analysis shows that cells arrested with a 1C DNA content. (C) Kinetics of Rad21 removal from G1 chromatin. Cells bearing the *mis4-367* mutation were arrested in G1 at 25°C as in (A) and then shifted to 36.5°C to prevent further cohesin loading. Rad21-PK fluorescence was measured from nuclear spreads at the indicated time-points (50-100 nuclei per sample). Error bar = 95% confidence interval of the mean with  $\alpha = 0.05$ . (D) The curves in (C) were fitted to a single exponential (one phase decay) to estimate Rad21 half-life on chromatin. Error bars = 95% confidence interval of the mean with  $\alpha = 0.05$ . The dotted lines show the 95% confidence bands. (E) Rad21 half-life on G1 chromatin. The error bars represent the 95% confidence intervals. (F) DNA content analysis showing that cells remained arrested with a G1 DNA content during the duration of the experiment.

The experiment in (A) indicates that the steady state amount of chromatin-bound Rad21 is increased in *wpl1Δ* and *pds5Δ* cells and the double-mutant behaves as *pds5Δ*, showing that *pds5Δ* is epistatic to *wpl1Δ*. This is consistent with Wpl1 and Pds5 acting in a common pathway that stimulates cohesin removal from chromatin. Loss of Pds5 may slightly alter the stability of cohesin binding to DNA, resulting in a lower steady-state.

A similar relationship between Wpl1 and Pds5 was deduced from the kinetics of Rad21 removal from chromatin upon inactivation of the cohesin loader (C). Rad21 half-life on chromatin (E) is extended in *wpl1Δ* and to a lesser extent in *pds5Δ* and *pds5Δ* is epistatic to *wpl1Δ*.

It is of note that the deletion of *wpl1* or *pds5* slows-down the rate of cohesin release but does not lead to the full stabilization of cohesin onto chromatin.

**Table S1.** Strains used in this study

|               | Strain | Genotype                                                                                                                                     |
|---------------|--------|----------------------------------------------------------------------------------------------------------------------------------------------|
| Figure 1A     | 3678   | <i>h<sup>-</sup> ura4 psm3-GFP-nat<sup>R</sup></i>                                                                                           |
|               | 3469   | <i>h<sup>-</sup> ura4 psm3-GFP-ura4<sup>+</sup> wpl1Δ::kan<sup>R</sup> eso1Δ::ura4<sup>+</sup></i>                                           |
|               | 3505   | <i>h<sup>-</sup> ura4 psm3-GFP-ura4<sup>+</sup> wpl1Δ::kan<sup>R</sup></i>                                                                   |
|               | 3676   | <i>h<sup>-</sup> ura4 psm3-GFP-nat<sup>R</sup> pds5Δ::ura4<sup>+</sup></i>                                                                   |
| Figure 1B     | 2      | <i>h<sup>-</sup></i>                                                                                                                         |
|               | 2967   | <i>h<sup>-</sup> ura4 pds5Δ::ura4<sup>+</sup></i>                                                                                            |
| Figure 1C     | 2      | <i>h<sup>-</sup></i>                                                                                                                         |
|               | 3738   | <i>h<sup>-</sup> pds5Δ::nat<sup>R</sup></i>                                                                                                  |
|               | 5415   | <i>h<sup>-</sup> pds5Δ::nat<sup>R</sup> clr6-1</i>                                                                                           |
|               | 5505   | <i>h<sup>-</sup> clr6-1</i>                                                                                                                  |
| Figure 2      | 405    | <i>h<sup>-</sup> cdc25-22</i>                                                                                                                |
|               | 3448   | <i>h<sup>-</sup> cdc25-22 rad21-9PK-kan<sup>R</sup></i>                                                                                      |
|               | 5687   | <i>h<sup>+</sup> cdc25-22 rad21-9PK-kan<sup>R</sup> pds5Δ::ura4<sup>+</sup> ura4</i>                                                         |
| Figure 3      | 405    | <i>h<sup>-</sup> cdc25-22</i>                                                                                                                |
|               | 3202   | <i>h<sup>-</sup> cdc25-22 mis4-367</i>                                                                                                       |
|               | 3333   | <i>h<sup>-</sup> cdc25-22 mis4-367 rad21-9PK-kan<sup>R</sup></i>                                                                             |
|               | 3378   | <i>h<sup>-</sup> cdc25-22 mis4-367 rad21-9PK-kan<sup>R</sup> pds5Δ::ura4<sup>+</sup> ura4</i>                                                |
| Figure 4      | 3202   | <i>h<sup>-</sup> cdc25-22 mis4-367</i>                                                                                                       |
|               | 3333   | <i>h<sup>-</sup> cdc25-22 mis4-367 rad21-9PK-kan<sup>R</sup></i>                                                                             |
|               | 3355   | <i>h<sup>-</sup> cdc25-22 mis4-367 rad21-9PK-kan<sup>R</sup> wpl1Δ::kan<sup>R</sup></i>                                                      |
|               | 3378   | <i>h<sup>-</sup> cdc25-22 mis4-367 rad21-9PK-kan<sup>R</sup> pds5Δ::ura4<sup>+</sup> ura4</i>                                                |
|               | 3385   | <i>h<sup>-</sup> cdc25-22 mis4-367 rad21-9PK-kan<sup>R</sup> wpl1Δ::kan<sup>R</sup> pds5Δ::ura4<sup>+</sup> ura4</i>                         |
|               |        |                                                                                                                                              |
| Figure 5      | 3202   | <i>h<sup>-</sup> cdc25-22 mis4-367</i>                                                                                                       |
|               | 3726   | <i>h<sup>-</sup> cdc25-22 mis4-367 rad21-9PK-kan<sup>R</sup> wpl1Δ::hyg<sup>R</sup> eso1Δ::ura4<sup>+</sup> ura4</i>                         |
|               | 4513   | <i>h<sup>-</sup> cdc25-22 mis4-367 rad21-9PK-kan<sup>R</sup> pds5Δ::ura4<sup>+</sup> eso1Δ::ura4<sup>+</sup> ura4</i>                        |
|               | 4514   | <i>h<sup>-</sup> cdc25-22 mis4-367 rad21-9PK-kan<sup>R</sup> wpl1Δ::hyg<sup>R</sup> pds5Δ::ura4<sup>+</sup> eso1Δ::ura4<sup>+</sup> ura4</i> |
| Figure S1     | 405    | <i>h<sup>-</sup> cdc25-22</i>                                                                                                                |
|               | 3202   | <i>h<sup>-</sup> cdc25-22 mis4-367</i>                                                                                                       |
|               | 6029   | <i>h<sup>-</sup> cdc25-22 mis4-367 pds5Δ::ura4<sup>+</sup> ura4</i>                                                                          |
| Figure S2     | 3202   | <i>h<sup>-</sup> cdc25-22 mis4-367</i>                                                                                                       |
|               | 3333   | <i>h<sup>-</sup> cdc25-22 mis4-367 rad21-9PK-kan<sup>R</sup></i>                                                                             |
|               | 3492   | <i>h<sup>-</sup> cdc25-22 mis4-367 pds5-GFP-kan<sup>R</sup></i>                                                                              |
|               | 4818   | <i>h<sup>-</sup> cdc25-22 mis4-367 pds5-GFP-kan<sup>R</sup> rad21-9PK-kan<sup>R</sup></i>                                                    |
| Figure S3     | 3202   | <i>h<sup>-</sup> cdc25-22 mis4-367</i>                                                                                                       |
|               | 3492   | <i>h<sup>-</sup> cdc25-22 mis4-367 pds5-GFP-kan<sup>R</sup></i>                                                                              |
|               | 3513   | <i>h<sup>-</sup> cdc25-22 mis4-367 pds5-GFP-kan<sup>R</sup> wpl1Δ::kan<sup>R</sup></i>                                                       |
|               | 5721   | <i>h<sup>-</sup> cdc25-22 mis4-367 pds5-GFP-kan<sup>R</sup> wpl1Δ::hyg<sup>R</sup> eso1Δ::ura4<sup>+</sup> ura4</i>                          |
| Figure S4 A-B | 2760   | <i>h<sup>-</sup> ura4<sup>+</sup>-nmt-res1Cter</i>                                                                                           |
|               | 3330   | <i>h<sup>-</sup> ura4<sup>+</sup>-nmt-res1Cter rad21-9PK-kan<sup>R</sup></i>                                                                 |
|               | 3332   | <i>h<sup>-</sup> ura4<sup>+</sup>-nmt-res1Cter rad21-9PK-kan<sup>R</sup> wpl1Δ::kan<sup>R</sup></i>                                          |
|               | 3379   | <i>h<sup>-</sup> ura4<sup>+</sup>-nmt-res1Cter rad21-9PK-kan<sup>R</sup> pds5Δ::ura4<sup>+</sup></i>                                         |
|               | 3412   | <i>h<sup>-</sup> ura4<sup>+</sup>-nmt-res1Cter rad21-9PK-kan<sup>R</sup> wpl1Δ::kan<sup>R</sup> pds5Δ::ura4<sup>+</sup></i>                  |
| Figure S4 C-F | 2760   | <i>h<sup>-</sup> ura4<sup>+</sup>-nmt-res1Cter</i>                                                                                           |
|               | 3324   | <i>h<sup>-</sup> ura4<sup>+</sup>-nmt-res1Cter mis4-367 rad21-9PK-kan<sup>R</sup> wpl1Δ::kan<sup>R</sup></i>                                 |
|               | 3328   | <i>h<sup>-</sup> ura4<sup>+</sup>-nmt-res1Cter mis4-367 rad21-9PK-kan<sup>R</sup></i>                                                        |
|               | 3357   | <i>h<sup>-</sup> ura4<sup>+</sup>-nmt-res1Cter mis4-367 rad21-9PK-kan<sup>R</sup> pds5Δ::ura4<sup>+</sup></i>                                |
|               | 3413   | <i>h<sup>-</sup> ura4<sup>+</sup>-nmt-res1Cter mis4-367 rad21-9PK-kan<sup>R</sup> wpl1Δ::kan<sup>R</sup> pds5Δ::ura4<sup>+</sup></i>         |
